# Supplementary material
Source: PubMed Central journal article supplement (PMC6377154)
Supplement: NIHMS1514235-supplement-1.pdf [file NIHMS1514235-supplement-1.pdf]

**Figure S1****A**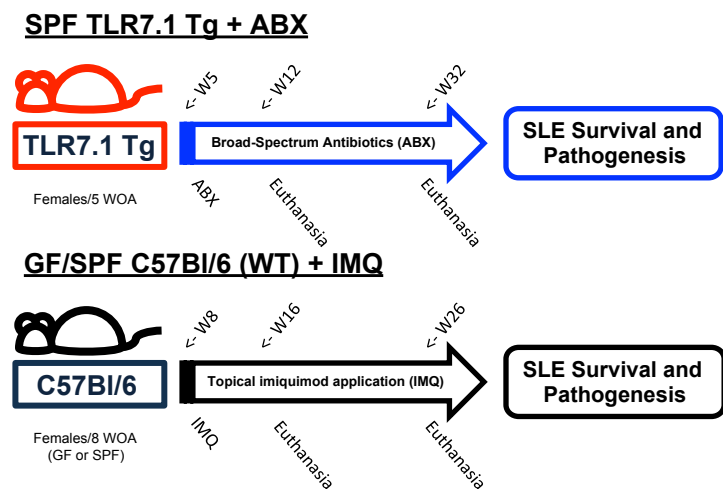**B**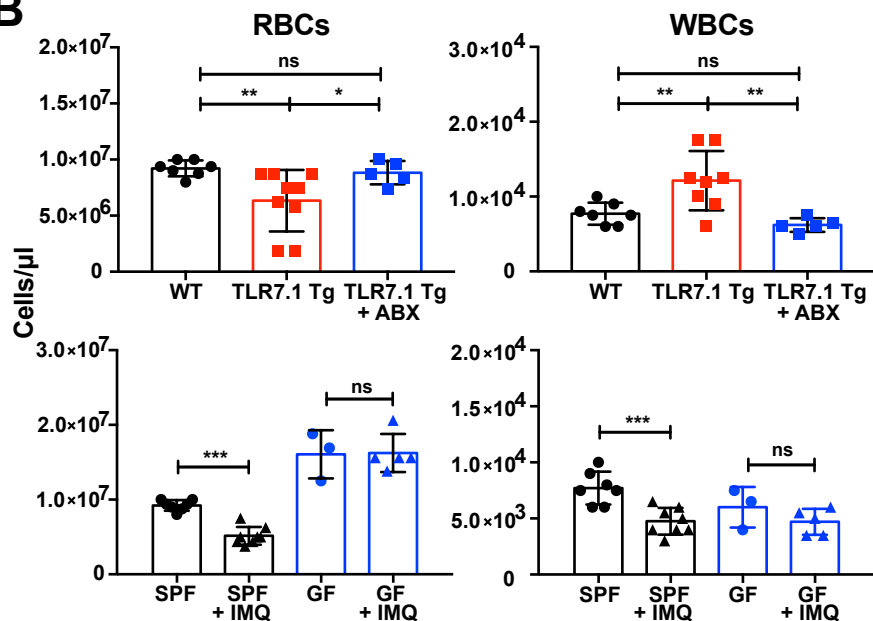**C**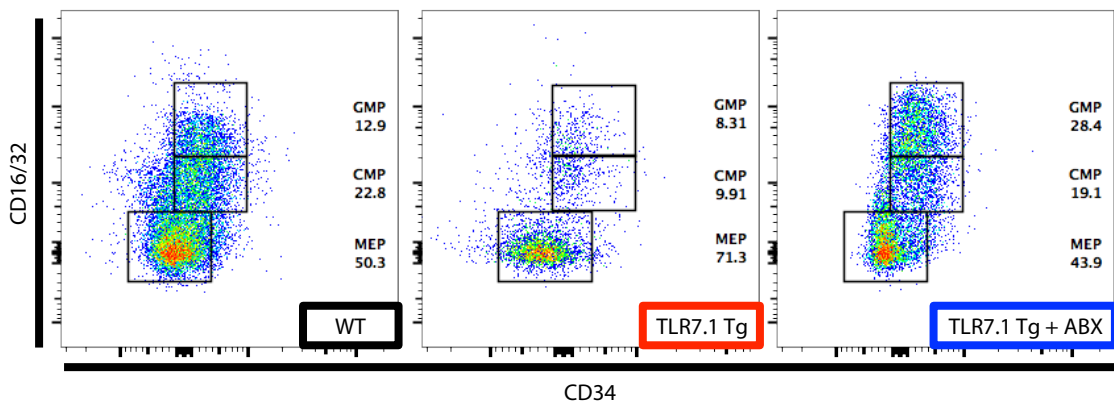**D**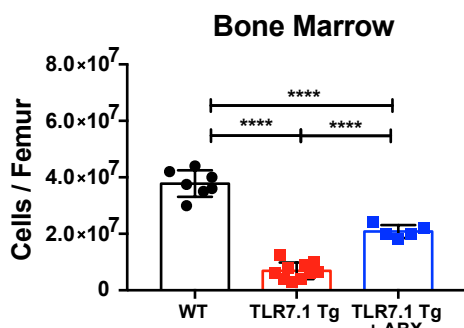**E**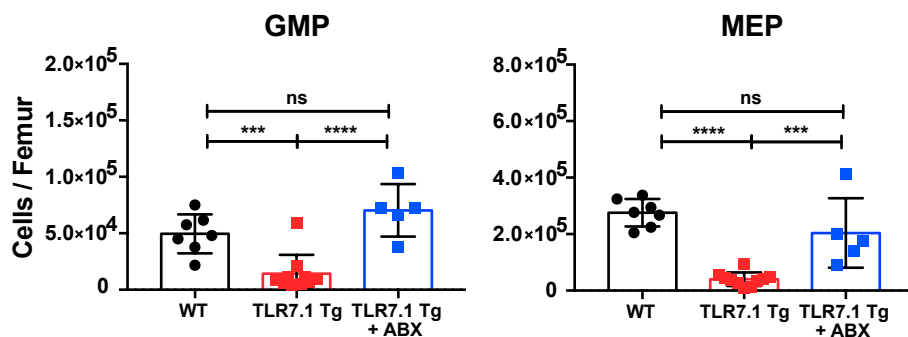**F**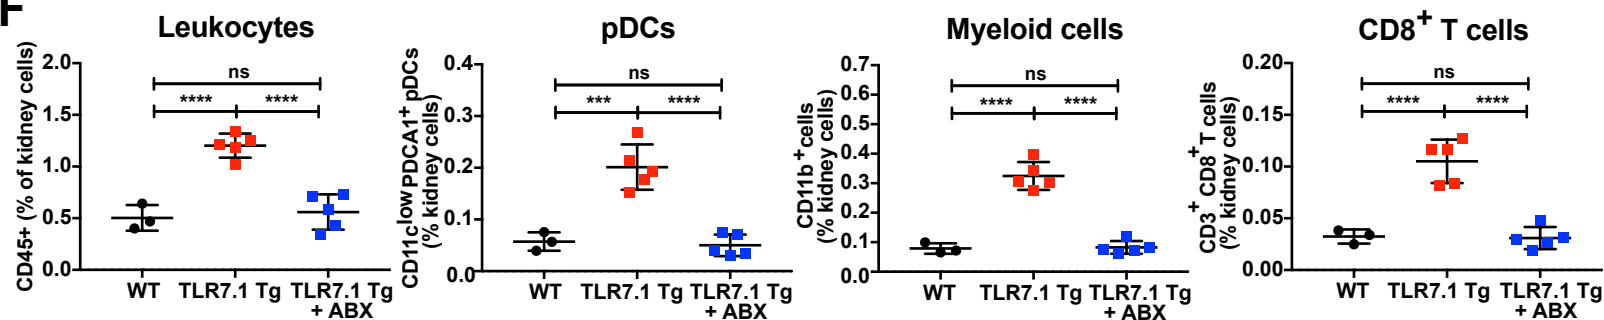

**Figure S1. Related to Figure 1. The gut microbiota exacerbates lupus-related mortality and pathogenesis.** (A) Overview of the experimental design: TLR7.1 Tg lupus-prone mice were treated with ABX and C57Bl/6 mice were treated with topical IMQ to induce a lupus-like syndrome. Age in weeks is listed along the arrows describing the intervention. Starting age is listed below the mouse strains. Experimental cohorts of TLR7.1 Tg and C57Bl/6 mice were sacrificed at 12 and 16 weeks of age, respectively. (B) Red and white blood cell counts. Bone marrow cells were isolated from the left femur and granulocyte-monocyte progenitors as well as megakaryocyte-erythrocyte progenitors were analyzed by flow cytometry. (C) Representative FACS plots of bone marrow progenitors. (D) Bone marrow cell counts. (E) Total granulocyte-monocyte and megakaryocyte-erythrocyte progenitor numbers in the bone marrow. Cells from kidneys were isolated and analyzed by flow cytometry. (F) Frequencies of leukocytes, pDCs, myeloid cells, and CD8<sup>+</sup> T cells in the kidneys. The results are expressed as mean  $\pm$  SEM (n = 3-20 mice per group). The results are representative of at least two independent experiments. \*P<0.05 was considered statistically significant; \*\*P <0.01; \*\*\*P<0.001; \*\*\*\*P<0.0001; ns = not significant; WOA = weeks of age; RBCs = red blood cells; WBCs = white blood cells; GMP = granulocyte-monocyte progenitors; CMP = common myeloid progenitors; MEP = megakaryocyte-erythrocyte progenitors.

**Figure S2****A**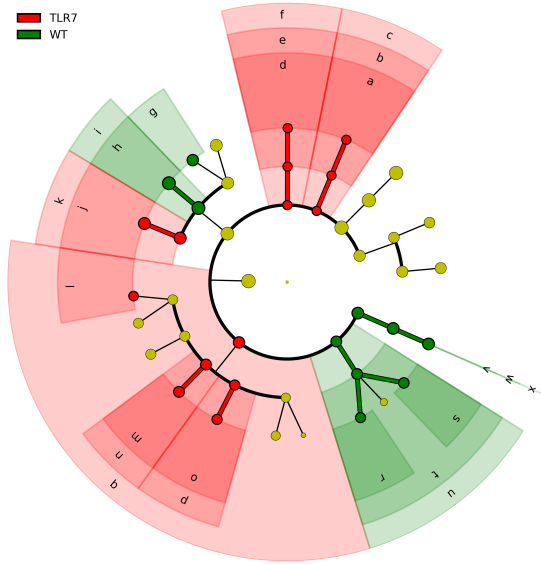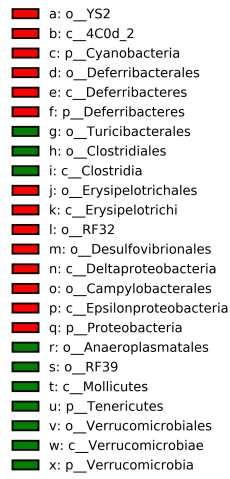**B**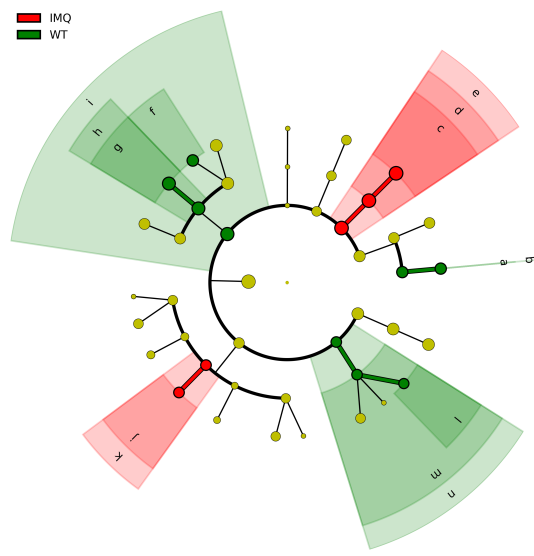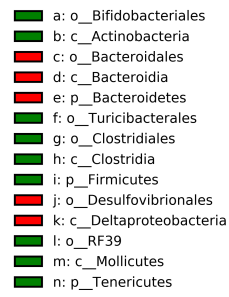**C**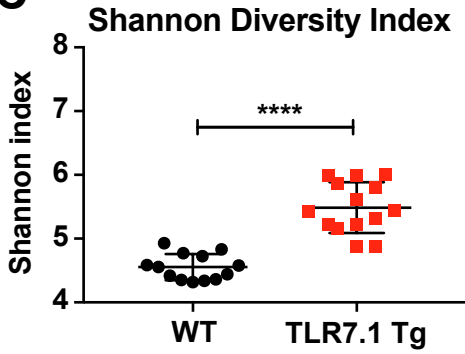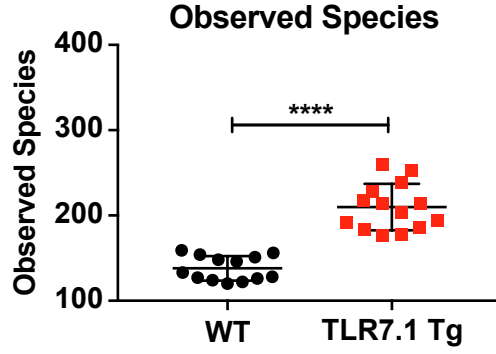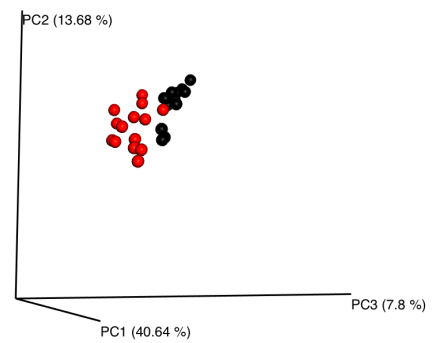**D**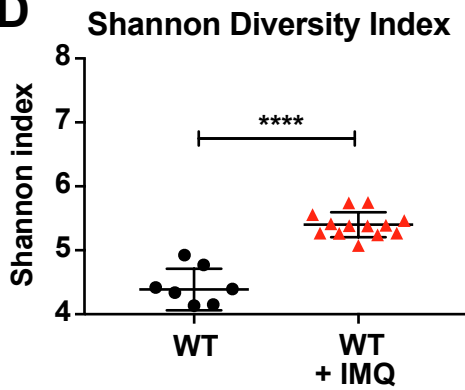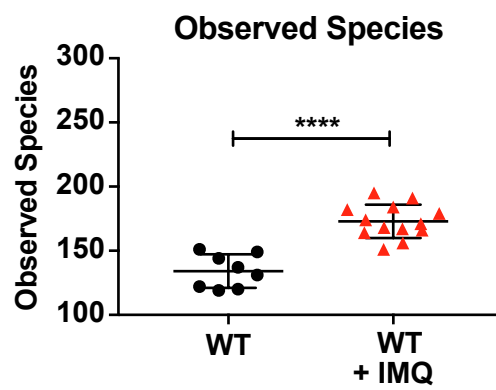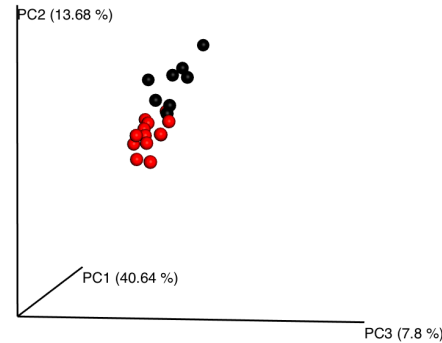**E**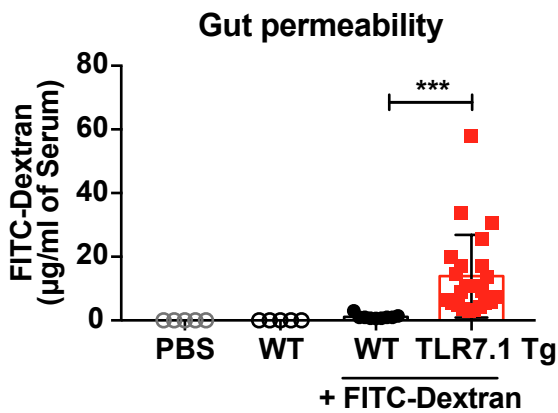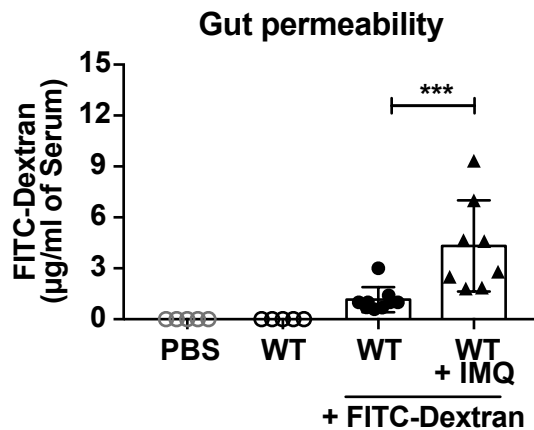

**Figure S2. Related to Figure 2. Increased abundance and translocation of lactobacilli in lupus.** Fecal pellets from WT, TLR7.1 Tg, and C57Bl/6 mice treated with IMQ were collected; bacterial DNA was isolated and sequenced. Cladograms of altered taxa in (A) TLR7.1 Tg and (B) C57Bl/6 mice treated with IMQ compared to WT mice. Shown are significantly altered taxa (increased in red, decreased in green). Alpha and beta diversity plots of (C) TLR7.1 Tg and (D) C57Bl/6 mice treated with IMQ compared to WT mice. (E) Mice were fasted for 4h and gavaged with FITC-Dextran. Serum FITC-dextran levels in TLR7.1 Tg and C57Bl/6 mice treated with IMQ. The results are expressed as mean  $\pm$  SEM (n = 3-20 mice per group). Data are representative of at least three independent experiments. \*P<0.05 was considered statistically significant; \*\*P<0.01; \*\*\*P<0.001; \*\*\*\*P<0.0001; ns = not significant.



# Figure S3

## A SPF C57Bl/6 (WT) cohoused with TLR7.1 Tg

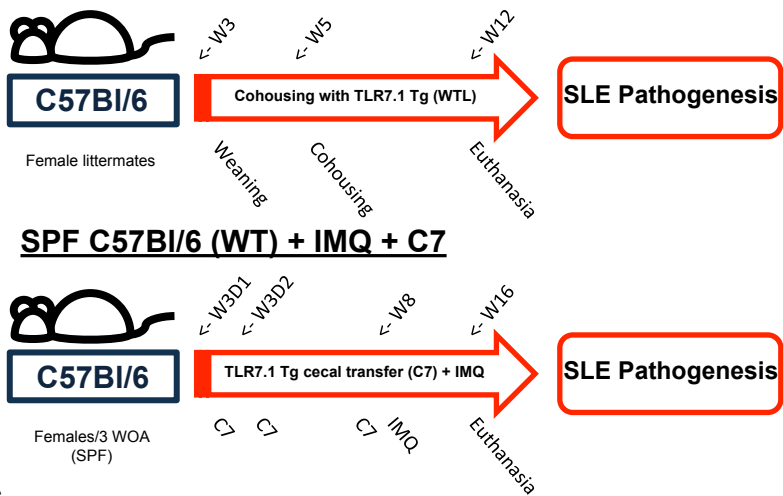

## B

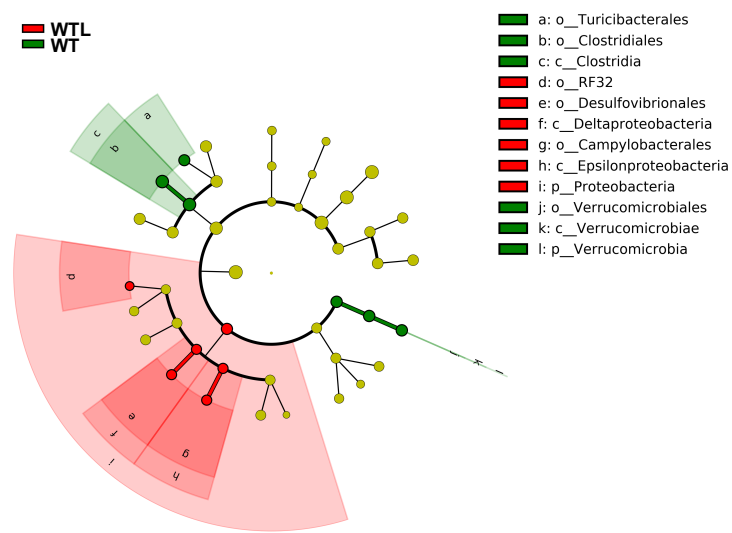

## C Shannon Diversity Index

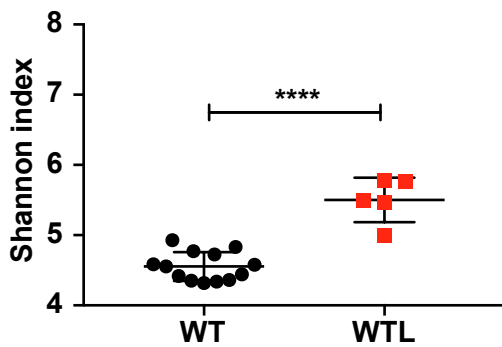

## Observed Species

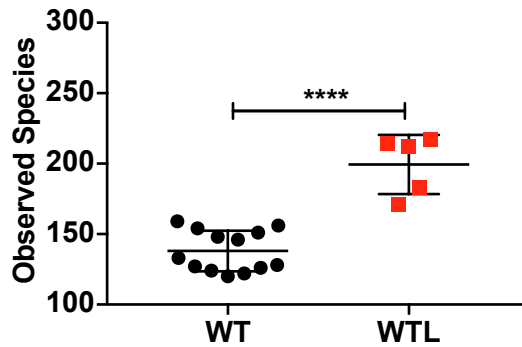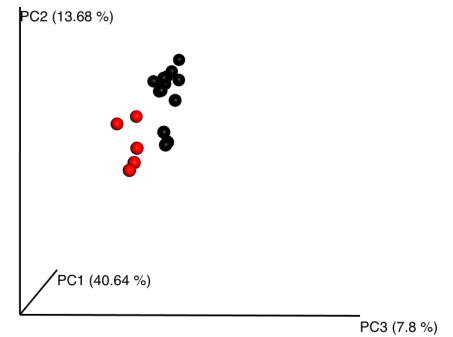

## D Gut Permeability

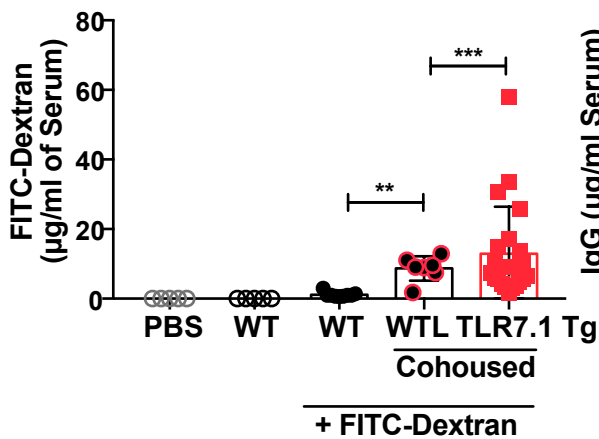

## E Total IgG

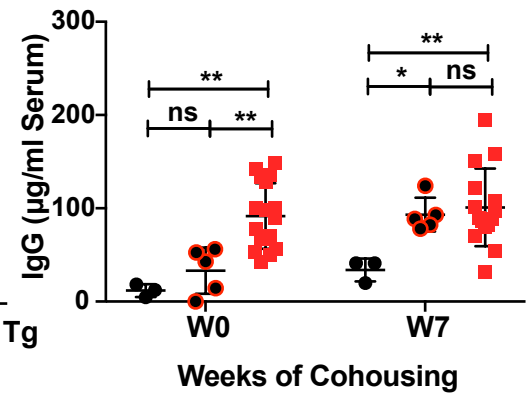

## F Total IgA

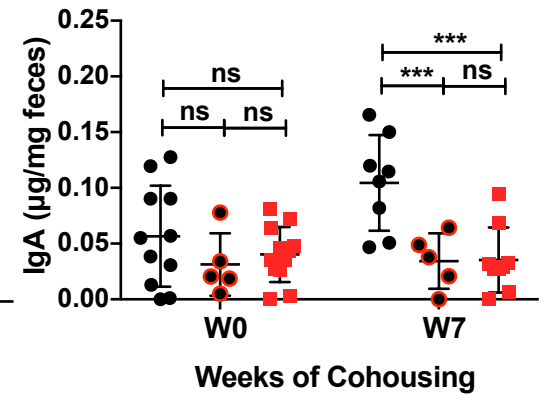

## G Gut Permeability

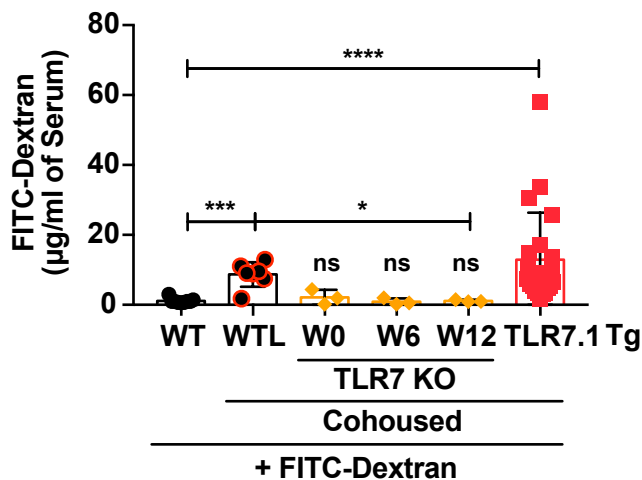

## H

## Gut Permeability

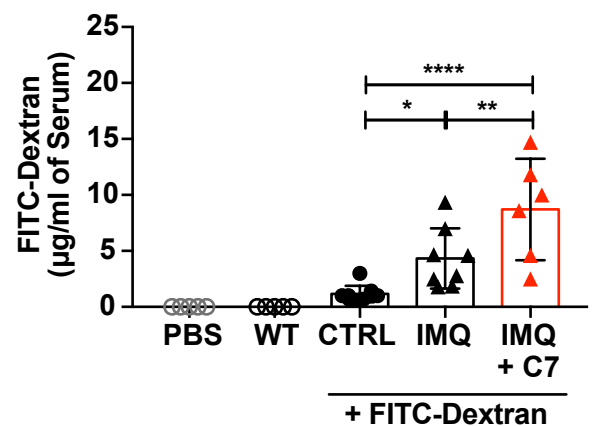

**Figure S3. Related to Figure 3. Bacterial communities increased in TLR7-dependent lupus models are transferable and exacerbate lupus-related pathogenesis.** (A) Overview of the experimental design: C57Bl/6 littermates (WTL) were cohoused with TLR7.1 Tg mice. SPF C57Bl/6 mice were treated with IMQ and gavaged with cecal content of TLR7.1 Tg mice (TLR7-derived cecal microbiota; C7). Age in weeks is listed along the arrows describing the intervention. Starting age is listed below the mouse strains. Fecal pellets from WT, WTL, and C57Bl/6 mice treated with IMQ and C7 were collected; bacterial DNA was isolated and sequenced. (B) Cladogram of altered taxa in WTL compared to WT mice. Shown are significantly altered taxa (increased in red, decreased in green). (C) Alpha and beta diversity plots of WTL compared to WT mice. (D-F) WTL were cohoused with TLR7.1 Tg mice and gavaged with FITC-Dextran after 7 weeks of cohousing, at which point sera and fecal pellets were collected. (D) Serum FITC-dextran was measured 3 hours post-gavage. (E) Total IgG levels in WTL sera were measured. (F) Total IgA levels in fecal pellets supernatants. TLR7 KO mice were cohoused with TLR7.1 Tg mice and gavaged with FITC-Dextran before (W0), 6 weeks (W6), and 12 weeks (W12) after cohousing, at which point sera were collected. (G) FITC-dextran levels in TLR7 KO mice sera. (H) FITC-dextran levels in C57Bl/6 mice treated with IMQ and gavaged with C7. The results are expressed as mean  $\pm$  SEM (n = 5-20 mice per group). The results are representative of at least two independent experiments. \*P<0.05 was considered statistically significant; \*\*P<0.01; \*\*\*P<0.001; \*\*\*\*P<0.0001; ns = not significant; WOA = week of age.

**Figure S4****A**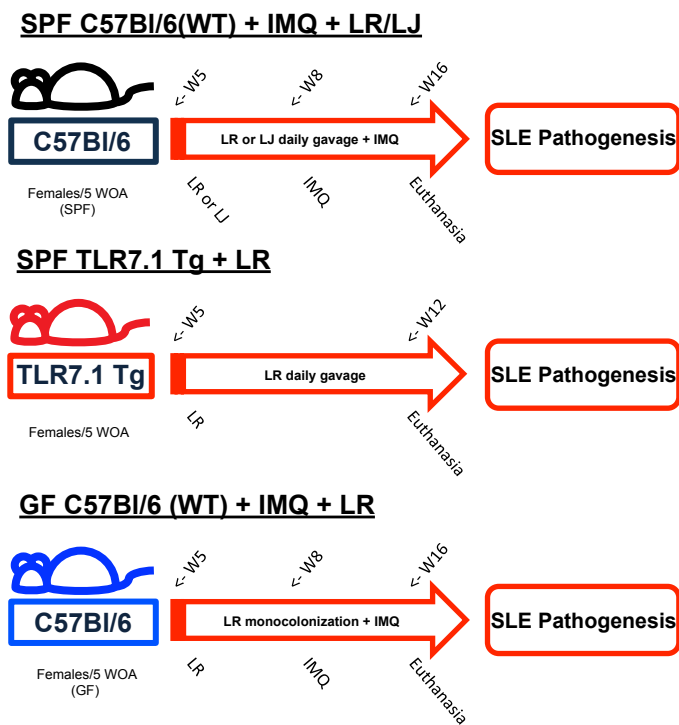**B**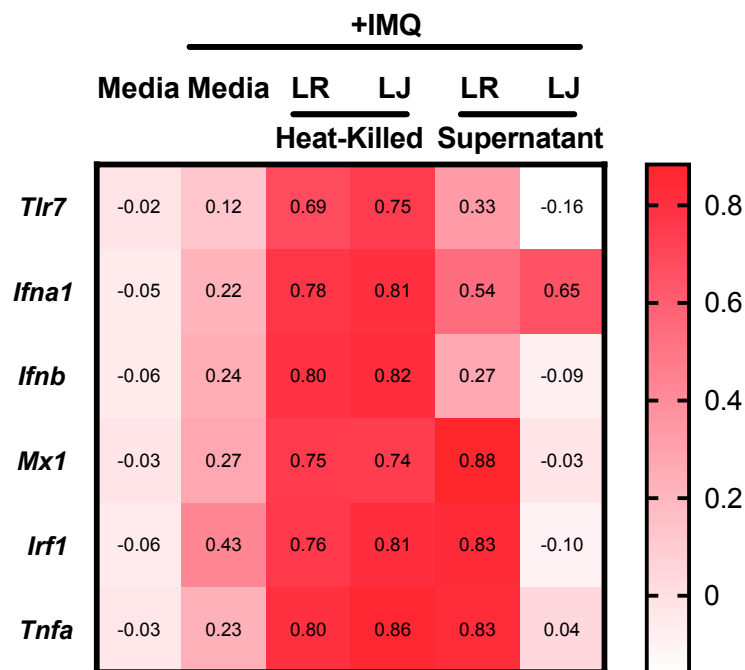**C**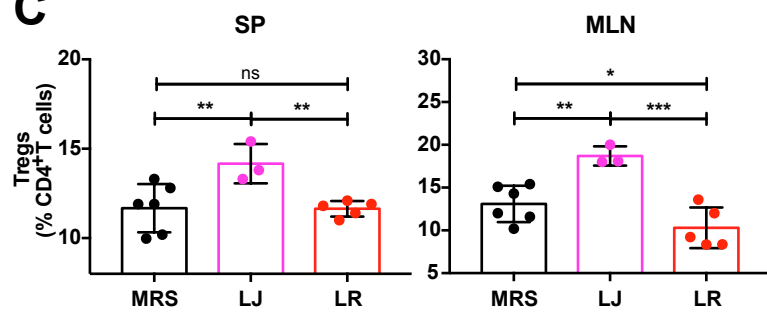**D**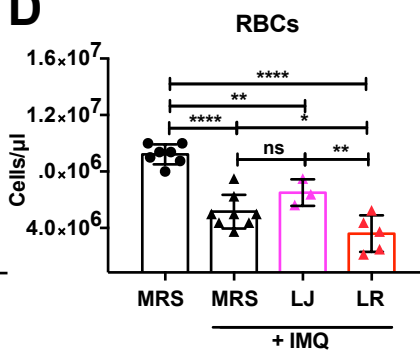**E**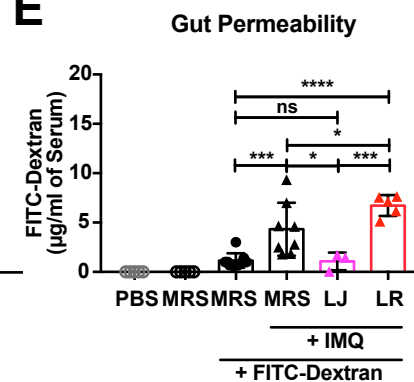**F**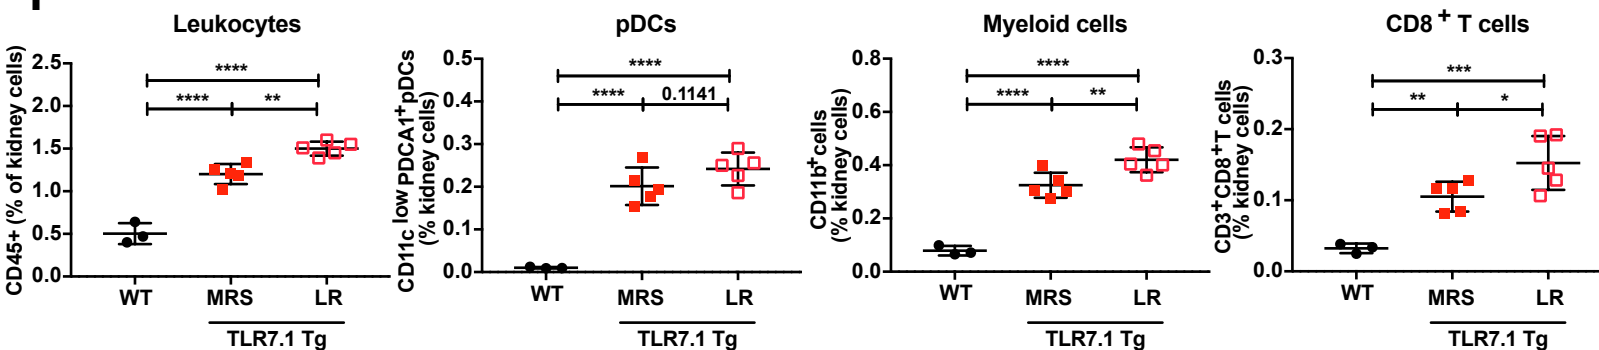**G**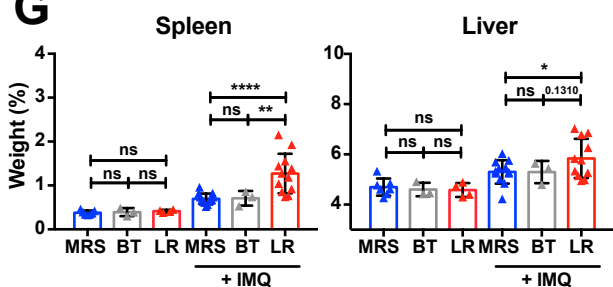**H**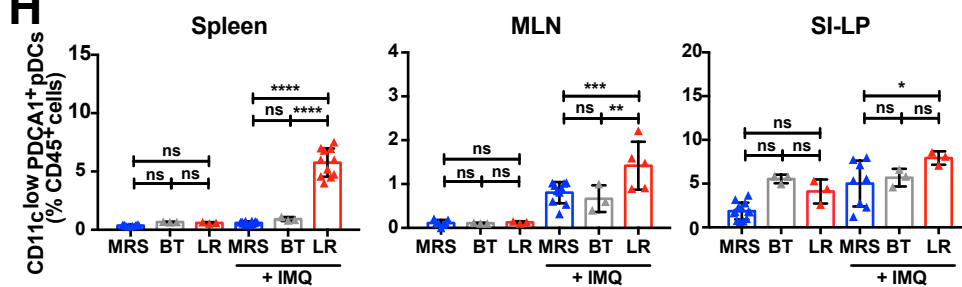

**Figure S4. Related to Figure 4. *L. reuteri* exacerbates lupus-related pathogenesis.** (A) Overview of the experimental design: C57Bl/6 mice were treated with imiquimod (IMQ) and gavaged daily with De Man, Rogosa and Sharpe broth (MRS), *L. reuteri* (LR), or *L. johnsonii* (LJ) primary tissue isolates harvested from TLR7.1 Tg mice. TLR7.1 Tg mice were gavaged with MRS or LR. GF C57Bl/6 mice were treated with IMQ and monocolonized with LR. Age in weeks is listed along the arrows describing the intervention. Starting age is listed below the mouse strains. (B) Splenic pDCs from SPF C57Bl/6 mice were isolated and cultured with heat-killed *L. reuteri*, *L. johnsonii*, or their bacterial supernatants in the presence of IMQ. The expression of type I interferon-related genes was analyzed in pDC-derived RNA. Heat-map is shown including the log-fold changes of the relative expression of type I interferon-related genes compared to untreated pDCs. (C-E) SPF C57Bl/6 mice received MRS, *L. reuteri*, or *L. johnsonii*. (C) Treg frequencies in spleen and MLN, and (D) red blood cell (RBC) counts in whole blood were determined by flow cytometry and cell counting, respectively. (E) Mice were fasted for 4h and gavaged with FITC-dextran. Serum FITC-dextran levels were measured 3 hours post-gavage. (F) Kidneys from *L. reuteri*-gavaged TLR7.1 Tg mice were harvested for immunologic analysis. Shown are frequencies of leukocytes, pDCs, myeloid cells, and CD8+ T cells in the kidneys. (G-H) GF C57Bl/6 mice were treated with IMQ and monocolonized with *L. reuteri* or *B. thetaiotaomicron* (BT). Mice were sacrificed for organ weights and immunologic analysis. (G) Shown are weights of spleen and liver. (H) Cells from spleen, MLN, and SI-LP were isolated and analyzed by flow cytometry. Shown are frequency of pDCs in spleen, MLN, and SI-LP. The results are expressed as mean  $\pm$  SEM (n = 3-16 mice per group). The results are representative of at least two independent experiments. \*P<0.05 was considered statistically significant; \*\*P<0.01; \*\*\*P<0.001; \*\*\*\*P<0.0001; ns = not significant; WOA = week of age.

**Figure S5**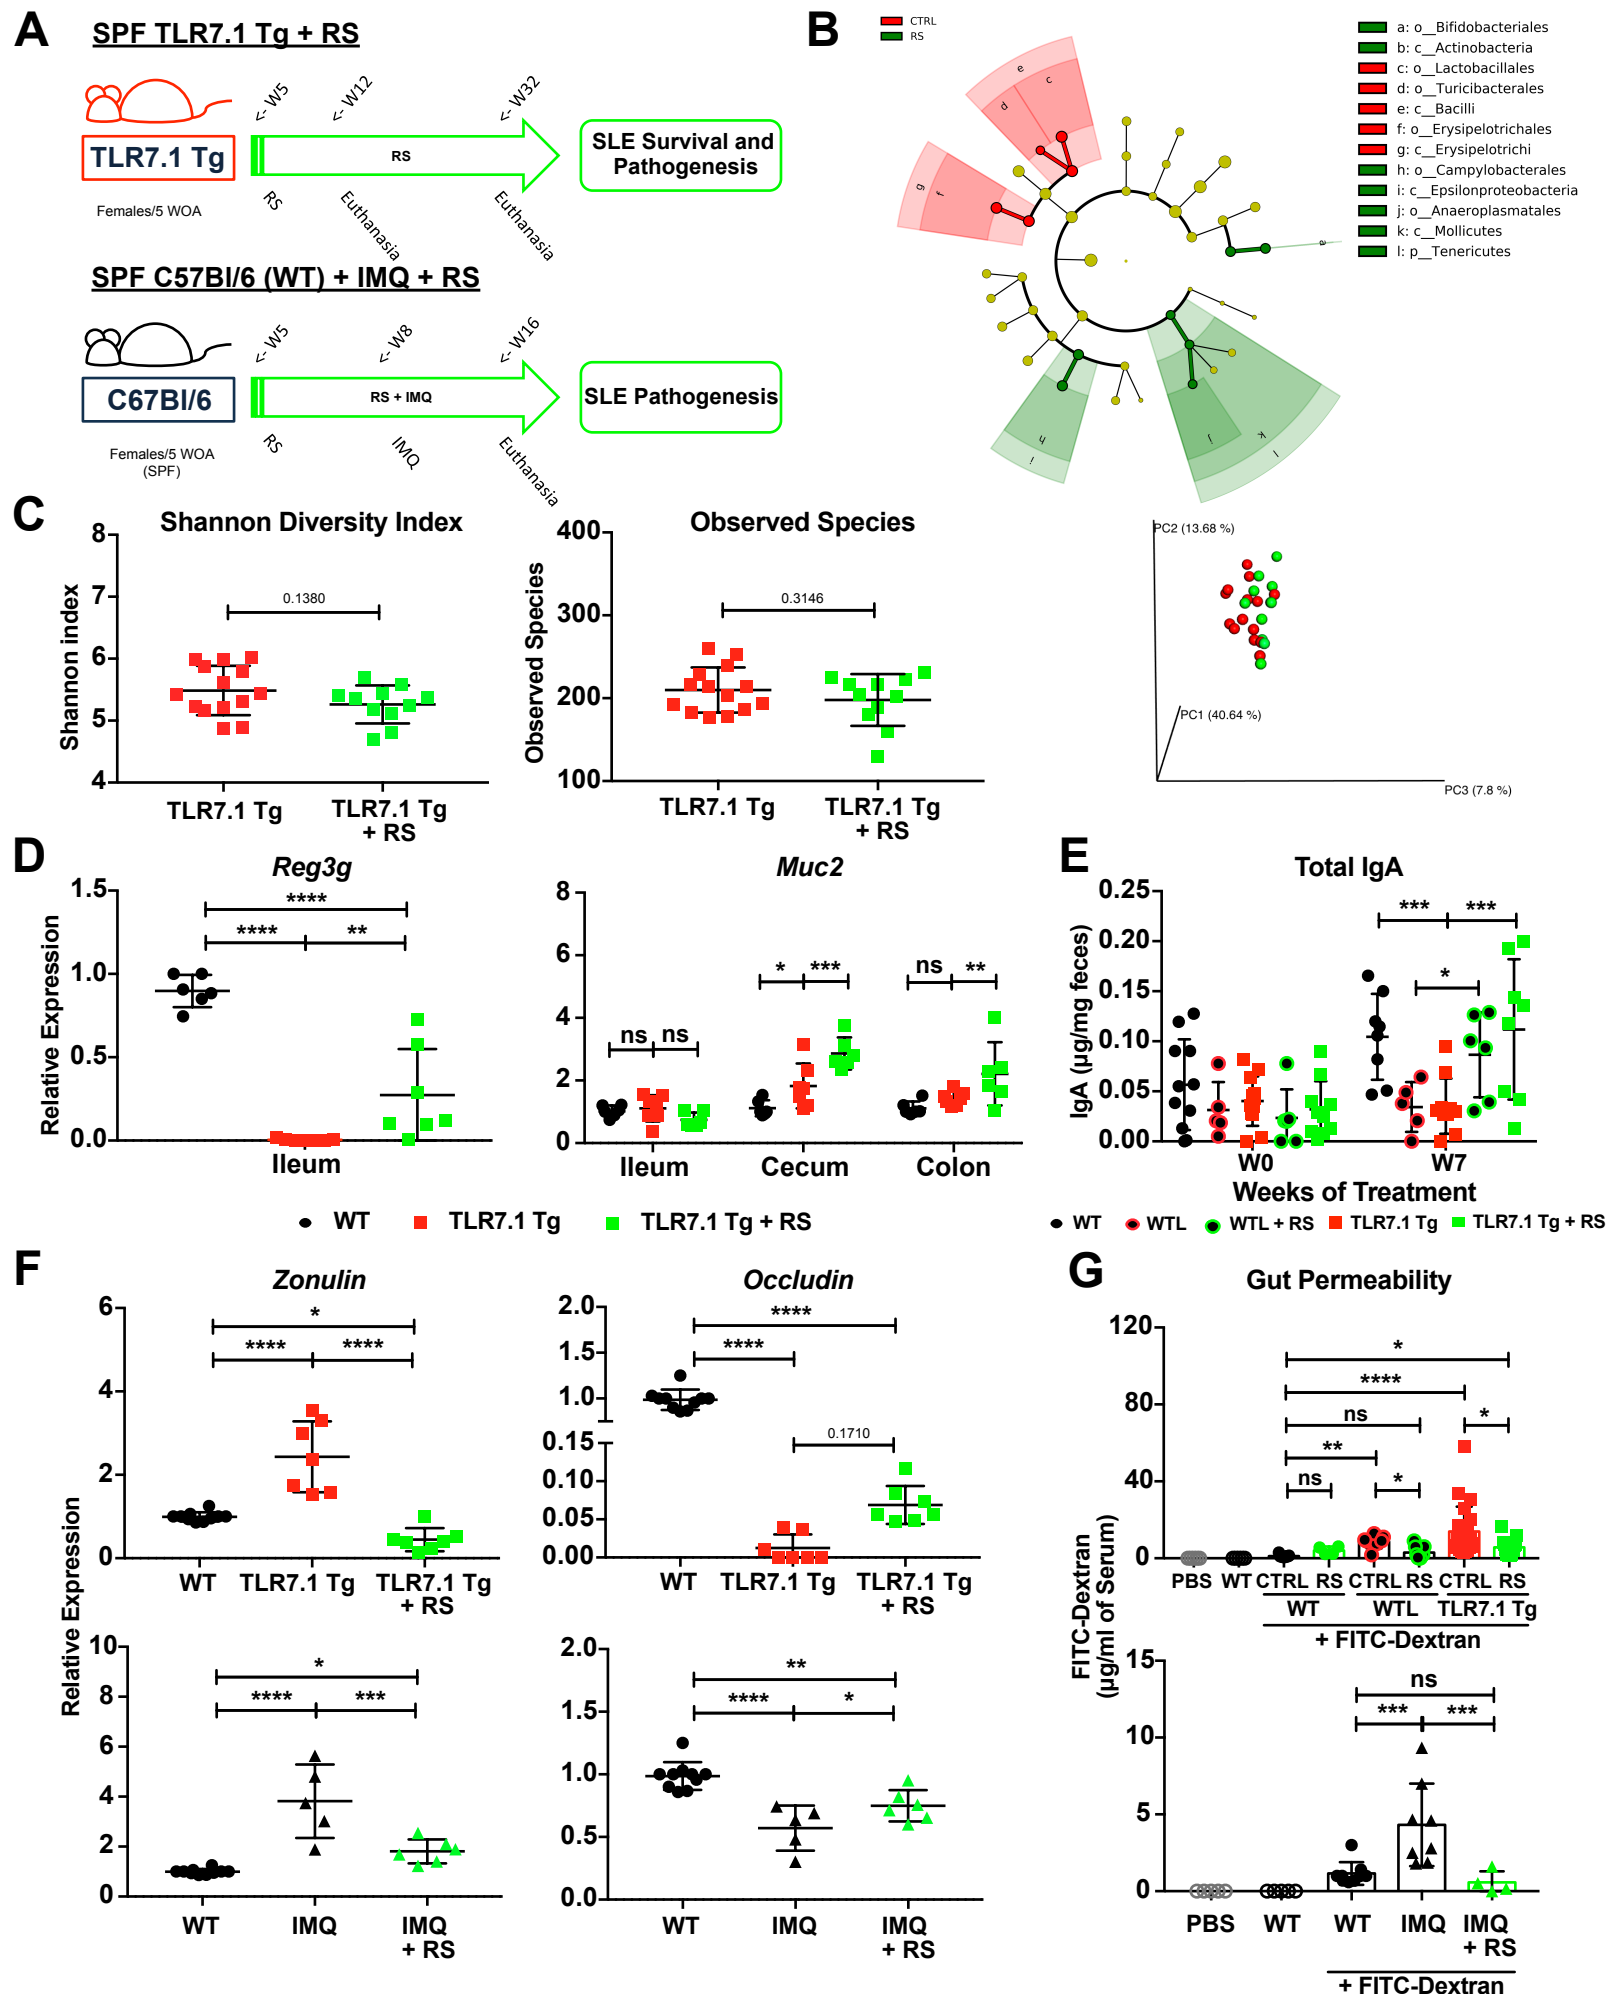

**Figure S5. Related to Figure 5. RS modulates the gut microbiome and decreases *L. reuteri* translocation.** (A) Overview of the experimental design: TLR7.1 Tg mice were fed with RS and C57Bl/6 mice were treated with IMQ and fed with RS. Age in weeks is listed along the arrows describing the intervention. Starting age is listed below the mouse strains. Fecal pellets and gut segments from WT, TLR7.1 Tg, and TLR7.1 Tg mice fed with RS were collected; bacterial DNA was isolated and sequenced. (B) Cladogram of altered taxa in TLR7.1 Tg mice fed with RS compared to control (CTRL) diet. Shown are significantly altered taxa (increased in red, decreased in green). (C) Alpha and beta diversity plots of TLR7.1 Tg mice fed with RS compared to CTRL diet. Gut segments and fecal samples were collected from TLR7.1 Tg mice for RNA expression analysis and IgA quantification. (D) *RegIIIg* and *mucin* relative mRNA expression in ileum, cecum and colon. (E) Total IgA levels in fecal supernatants. (F) *Zonulin* and *occludin* relative mRNA expression in ileum. (G) Mice were fasted for 4h and gavaged with FITC-dextran. Serum FITC-Dextran levels were measured 3 hours post-gavage in RS-fed mice. The results are expressed as mean  $\pm$  SEM (n = 3-20 mice per group). Data are representative of at least three independent experiments. \*P<0.05 was considered statistically significant; \*\*P<0.01; \*\*\*P<0.001; \*\*\*\*P<0.0001; ns = not significant; WOA = week of age.

**Figure S6**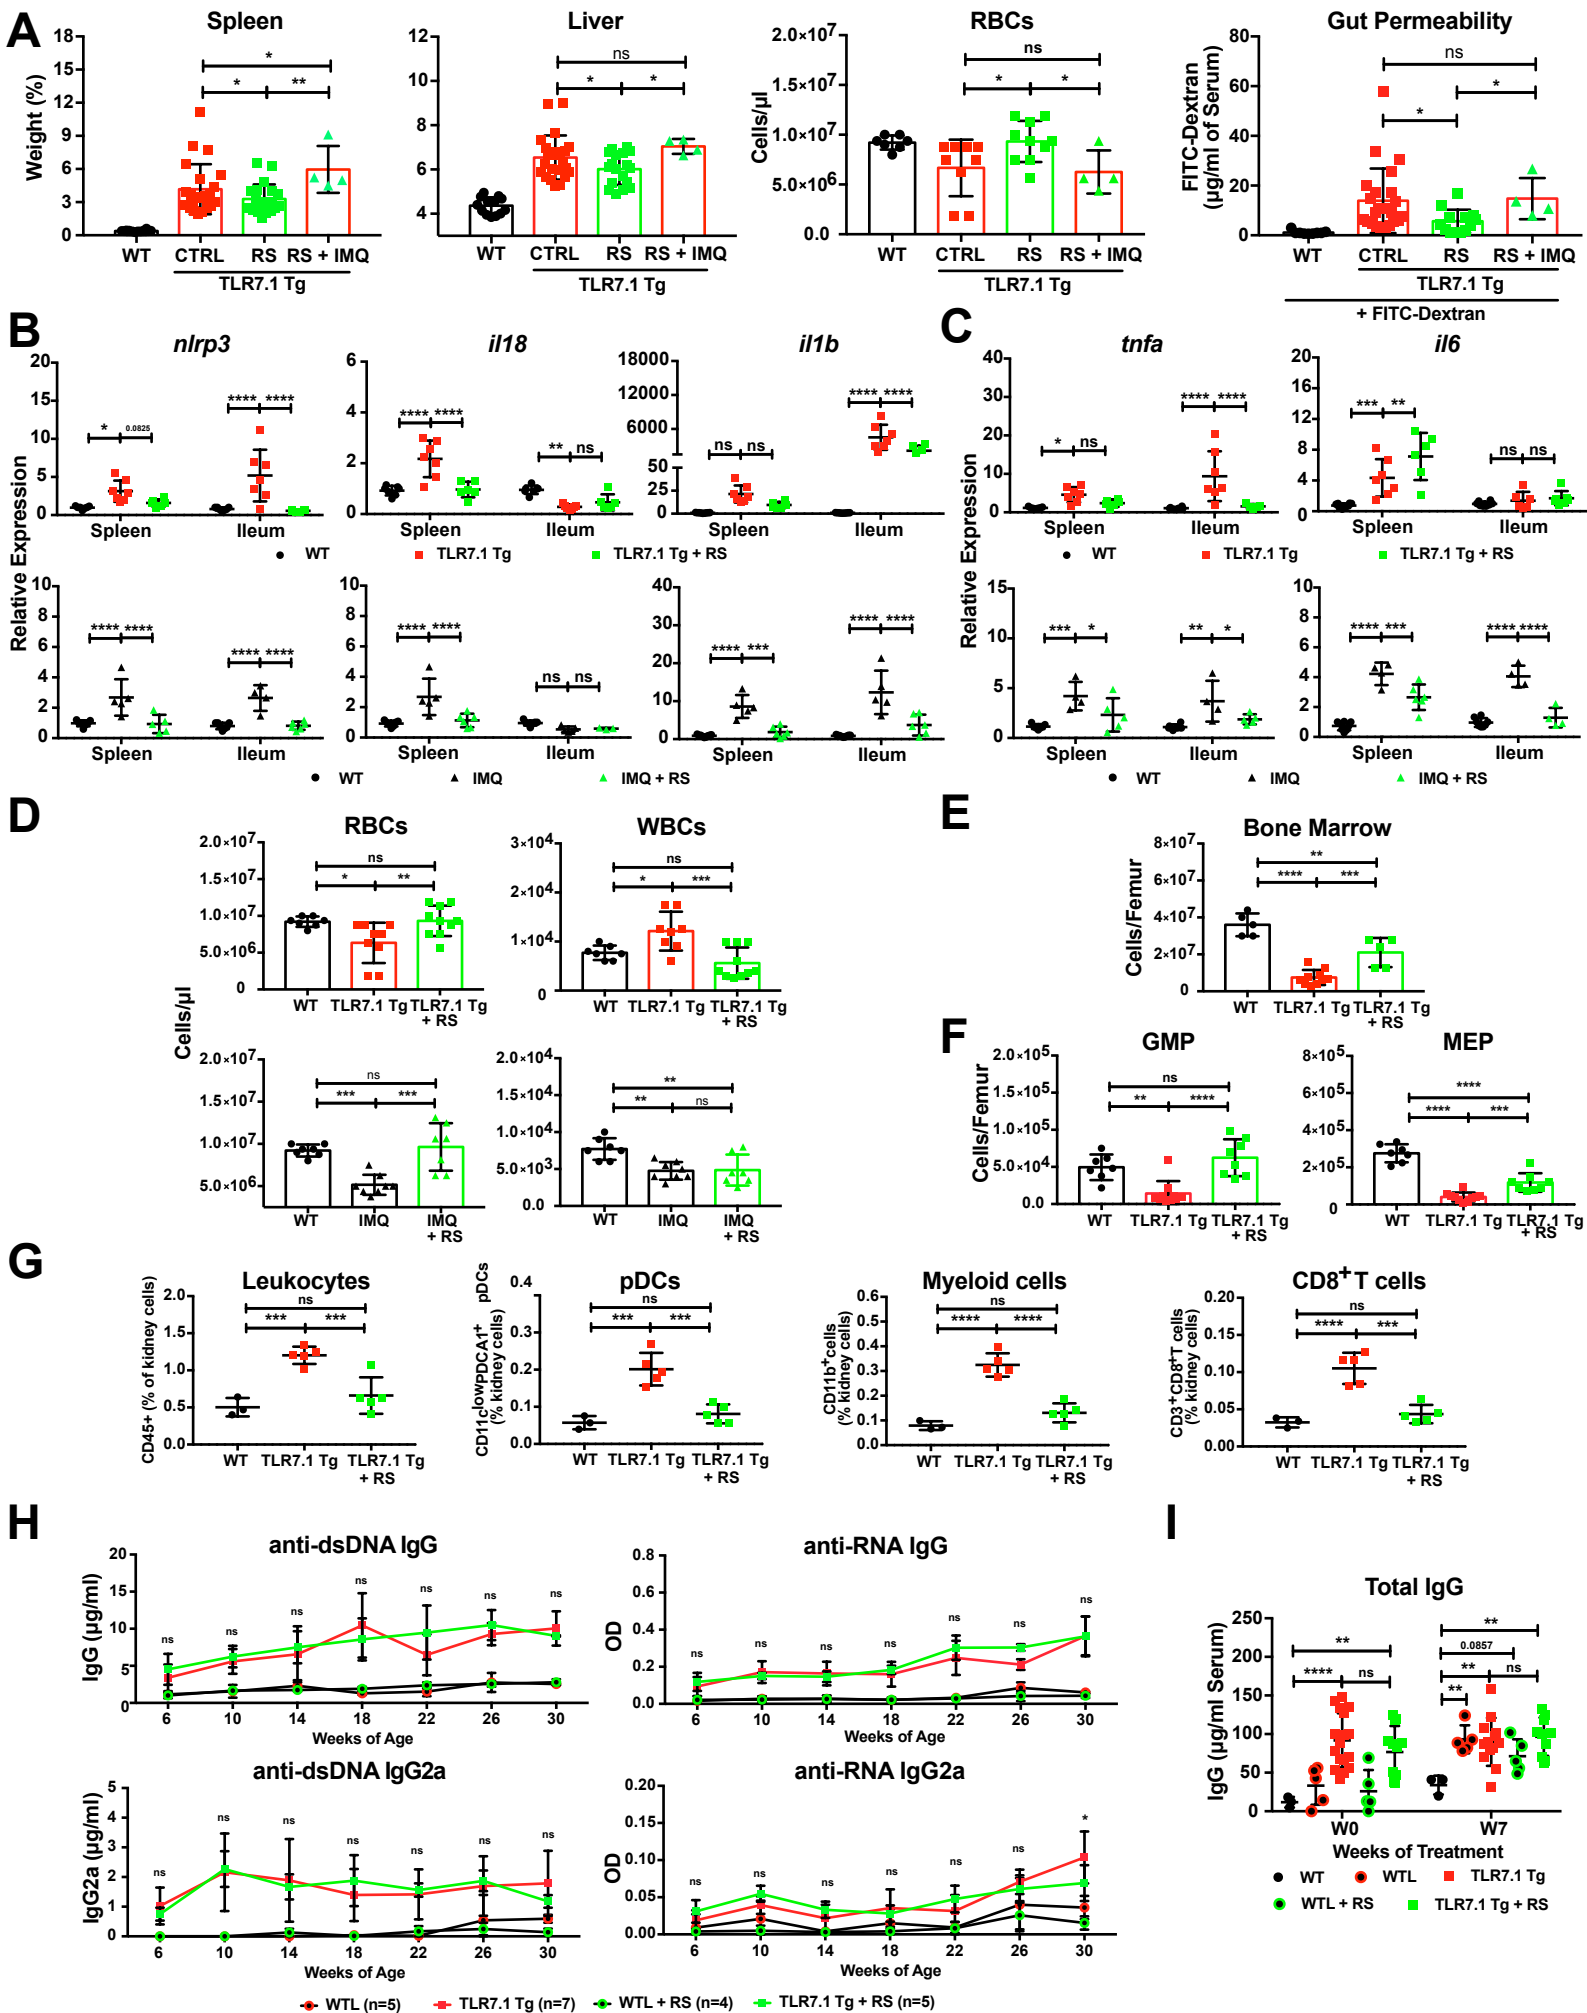

**Figure S6. Related to Figure 6. RS suppresses lupus-related mortality and pathogenesis.** RS-fed TLR7.1 Tg mice were treated with IMQ for 4 weeks and were sacrificed at 12 weeks of age. (A) Weights of spleen and liver, red blood cell counts, and serum FITC-dextran levels in RS-fed IMQ-treated mice. Experimental cohorts of TLR7.1 Tg and C57Bl/6 mice treated with IMQ were fed RS and sacrificed at weeks 12 and 16, respectively. (B) *Nlrp3*, *il18*, and *il1b* relative mRNA expression in spleen and ileum. (C) *Tnfa* and *il6* relative mRNA expression in spleen and ileum. (D) Red blood cells and white blood cells counts. Bone marrow cells were isolated from the left femur and granulocyte-monocyte progenitors as well as megakaryocyte-erythrocyte progenitors were analyzed by flow cytometry. (E) Bone marrow cell counts. (F) Total granulocyte-monocyte and megakaryocyte-erythrocyte progenitor numbers in the bone marrow. (G) Cells from kidneys of RS-fed TLR7.1 Tg mice were isolated and analyzed by flow cytometry. Shown are frequencies of leukocytes, pDCs, myeloid cells, and CD8+ T cells in the kidneys. (H) WTL, TLR7.1 Tg, and TLR7.1 Tg mice fed with RS were bled longitudinally and sera were collected for ELISA. Shown are IgG and IgG2a anti-dsDNA and anti-ssRNA autoantibodies. (I) WT, WTL, and TLR7.1 Tg mice were bled before and after RS feeding. Shown are total IgG levels. The results are expressed as mean  $\pm$  SEM (Survival cohorts n = 8-28 mice per group; experimental cohorts n = 3-20 mice per group). The results are representative of at least two independent experiments. \*P <0.05 was considered statistically significant; \*\*P<0.01; \*\*\*P<0.001; \*\*\*\*P<0.0001; ns = not significant; RBCs = red blood cells; WBCs = white blood cells; GMP = granulocyte-monocyte progenitors; CMP = common myeloid progenitors; MEP = megakaryocyte-erythrocyte progenitors.



**Figure S7****A** **SPF C57BI/6 (WT) + IMQ + RS + LR**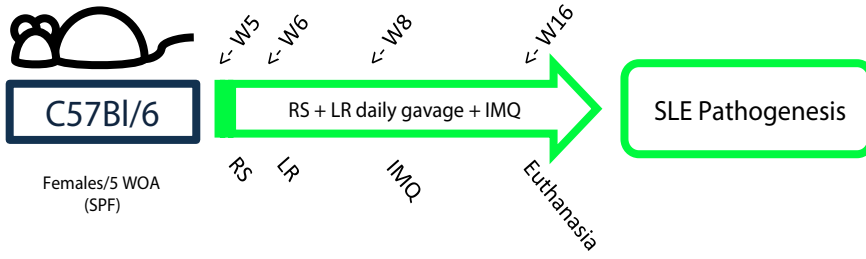**SPF TLR7.1 Tg + SCFA**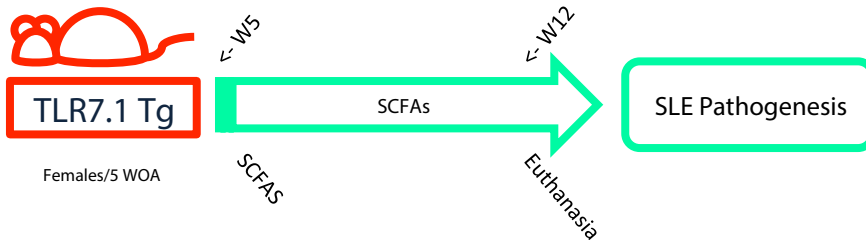**GF C57BI/6 (WT) + IMQ + LR + SCFAs**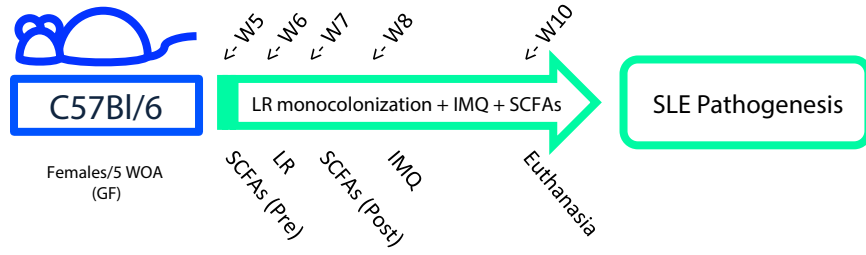**B** **Butyrate effect on *L. reuteri***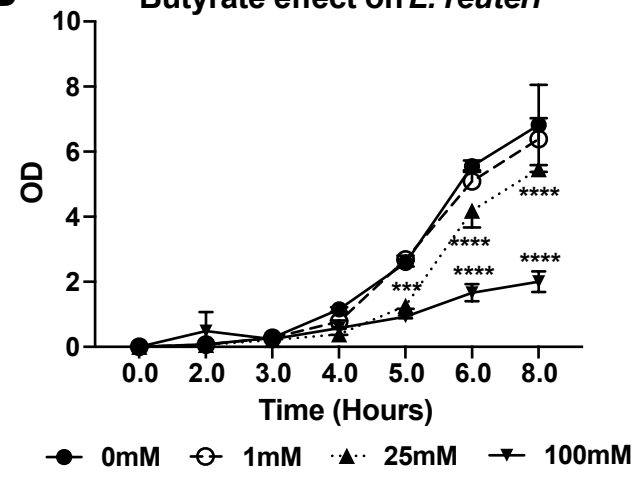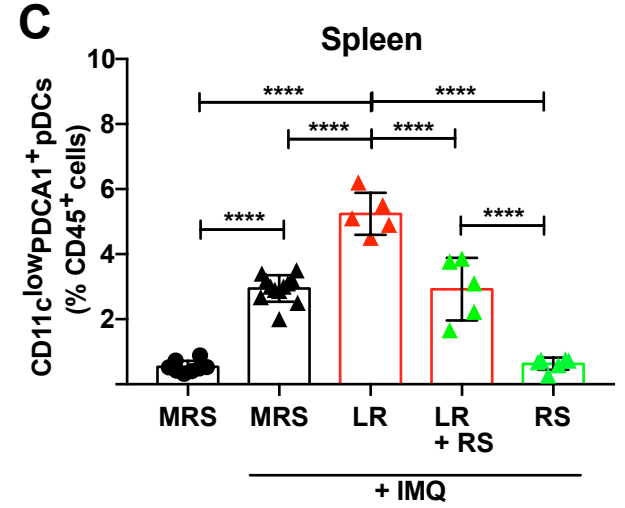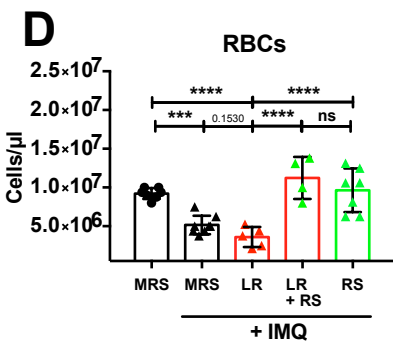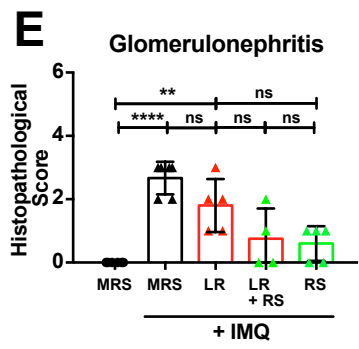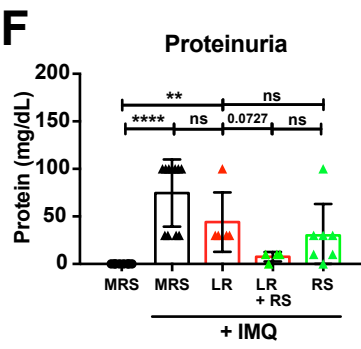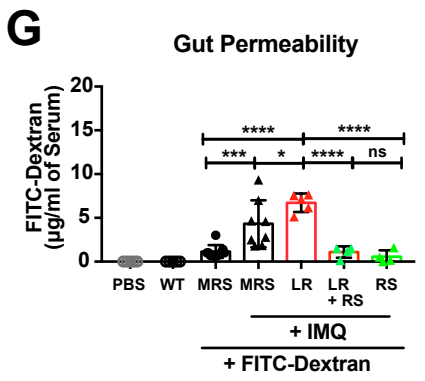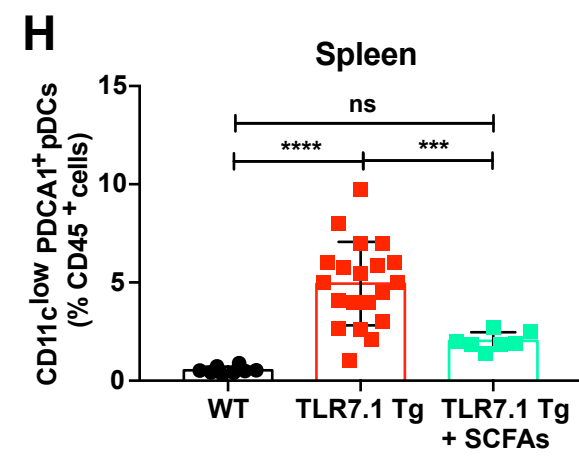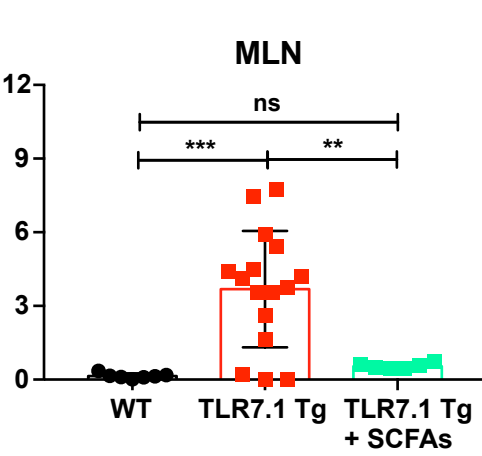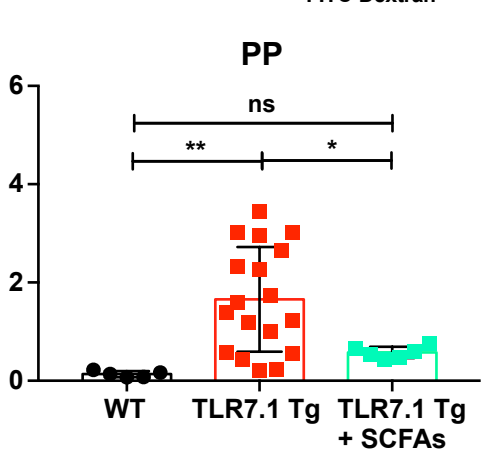

**Figure S7. Related to Figure 7. RS-induced SCFAs inhibit *L. reuteri* growth in vitro and *L. reuteri*-mediated autoimmunity in vivo.** (A) Overview of the experimental design: SPF C57Bl/6 WT mice were treated with imiquimod (IMQ), fed with RS, and gavaged daily with MRS media, *L. reuteri* (LR), or *L. johnsonii* (LJ) primary tissue isolates harvested from TLR7.1 Tg mice. TLR7.1 Tg mice were given SCFAs in their drinking water. GF C57Bl/6 mice received SCFAs one week before (Pre) or after (Post) *L. reuteri* monocolonization and were treated with IMQ. Age in weeks is listed along the arrows describing the intervention. Starting age is listed below the mouse strains. (B) Relative growth of LR cultured anaerobically with increasing doses of butyrate compared to MRS media alone. (C-H) RS-fed *L. reuteri*-gavaged IMQ-treated mice were sacrificed for immunological analysis and organ involvement. (C) Frequencies of pDCs in spleen. (D) Red blood cells counts. (E) Histopathologic scoring for glomerulonephritis. (F) Quantification of proteinuria. (G) Serum FITC-dextran levels 3 hours post-gavage with FITC-dextran. (H) Frequencies of pDCs in spleen, MLN, and PP of SCFAs-treated TLR7.1 Tg mice. The results are expressed as mean  $\pm$  SEM (n = 3-20 mice per group). The results are representative of at least two independent experiments. \*P<0.05 was considered statistically significant; \*\*P<0.01; \*\*\*P<0.001; \*\*\*\*P<0.0001; ns = not significant; WOA = week of age; RBCs = red blood cells.

**Table S1. Related to Figure 2. List of modulated bacterial taxa in TLR7.1 Tg mice.**

| <b>Table S1. List of modulated taxa in TLR7.1 Tg mice</b>                                      |                                |                             |                       |                 |
|------------------------------------------------------------------------------------------------|--------------------------------|-----------------------------|-----------------------|-----------------|
| <b>WT vs. TLR7.1 Tg</b>                                                                        |                                |                             |                       |                 |
| Enriched <sup>a</sup>                                                                          |                                |                             |                       |                 |
| Rank <sup>c</sup>                                                                              | Family                         | Genus                       | Species               | P value         |
| 1                                                                                              | <i>Rikenellaceae</i>           | <i>AF12</i>                 | not identified        | 2.73E-06        |
| 2                                                                                              | <i>Helicobacteraceae</i>       | not identified              | not identified        | 2.74E-06        |
| 3                                                                                              | <i>Paraprevotellaceae</i>      | <i>Paraprevotella</i>       | not identified        | 2.81E-06        |
| <b>4</b>                                                                                       | <b><i>Lactobacillaceae</i></b> | <b><i>Lactobacillus</i></b> | <b><i>reuteri</i></b> | <b>2.82E-06</b> |
| 5                                                                                              | <i>Desulfovibrionaceae</i>     | not identified              | not identified        | 3.74E-06        |
| 6                                                                                              | <i>Rikenellaceae</i>           | not identified              | not identified        | 4.81E-06        |
| 7                                                                                              | <i>Paraprevotellaceae</i>      | not identified              | not identified        | 7.64E-06        |
| 8                                                                                              | <i>Paraprevotellaceae</i>      | <i>Prevotella</i>           | not identified        | 7.64E-06        |
| 9                                                                                              | <i>Odoribacteraceae</i>        | <i>Odoribacter</i>          | not identified        | 9.82E-06        |
| 10                                                                                             | <i>Odoribacteraceae</i>        | not identified              | not identified        | 9.82E-06        |
| 11                                                                                             | <i>Porphyromonadaceae</i>      | <i>Parabacteroides</i>      | not identified        | 1.58E-05        |
| 12                                                                                             | <i>Porphyromonadaceae</i>      | not identified              | not identified        | 1.58E-05        |
| 13                                                                                             | <i>Coriobacteriaceae</i>       | not identified              | not identified        | 2.22E-05        |
| 14                                                                                             | <i>Desulfovibrionaceae</i>     | <i>Desulfovibrio</i>        | not identified        | 3.12E-05        |
| 15                                                                                             | <i>Helicobacteraceae</i>       | <i>Helicobacter</i>         | not identified        | 7.65E-05        |
| 16                                                                                             | <i>Deferribacteraceae</i>      | <i>Mucispirillum</i>        | not identified        | 2.01E-04        |
| 17                                                                                             | <i>Deferribacteraceae</i>      | not identified              | not identified        | 2.01E-04        |
| 18                                                                                             | <i>Deferribacteraceae</i>      | <i>Mucispirillum</i>        | <i>schaedleri</i>     | 2.01E-04        |
| 19                                                                                             | <i>Bacteroidaceae</i>          | <i>Bacteroides</i>          | <i>acidifaciens</i>   | 6.12E-04        |
| 20                                                                                             | <i>Erysipelotrichaceae</i>     | not identified              | not identified        | 2.23E-03        |
| 21                                                                                             | <i>Erysipelotrichaceae</i>     | <i>Allobaculum</i>          | not identified        | 3.08E-03        |
| 22                                                                                             | <i>Desulfovibrionaceae</i>     | <i>Bilophila</i>            | not identified        | 9.25E-03        |
| 23                                                                                             | <i>Rikenellaceae</i>           | <i>Rikenella</i>            | not identified        | 2.00E-02        |
| Suppressed <sup>b</sup>                                                                        |                                |                             |                       |                 |
| Rank <sup>c</sup>                                                                              | Family                         | Genus                       | Species               | P value         |
| 1                                                                                              | <i>Lachnospiraceae</i>         | <i>Anaerostipes</i>         | not identified        | 7.55E-06        |
| 2                                                                                              | <i>Verrucomicrobiaceae</i>     | not identified              | not identified        | 7.58E-06        |
| 3                                                                                              | <i>Verrucomicrobiaceae</i>     | <i>Akkermansia</i>          | <i>muciniphila</i>    | 7.58E-06        |
| 4                                                                                              | <i>Verrucomicrobiaceae</i>     | <i>Akkermansia</i>          | not identified        | 7.58E-06        |
| 5                                                                                              | <i>Turicibacteraceae</i>       | not identified              | not identified        | 1.34E-04        |
| 6                                                                                              | <i>Turicibacteraceae</i>       | <i>Turicibacter</i>         | not identified        | 1.34E-04        |
| 7                                                                                              | <i>Anaeroplasmataceae</i>      | <i>Anaeroplasma</i>         | not identified        | 1.08E-03        |
| 8                                                                                              | <i>Anaeroplasmataceae</i>      | not identified              | not identified        | 1.08E-03        |
| <b>9</b>                                                                                       | <b><i>Clostridiaceae</i></b>   | <b>not identified</b>       | <b>not identified</b> | <b>5.50E-03</b> |
| 10                                                                                             | <i>Lachnospiraceae</i>         | not identified              | not identified        | 5.67E-03        |
| 11                                                                                             | <i>Mitochondria</i>            | not identified              | not identified        | 1.69E-02        |
| 12                                                                                             | <i>Bifidobacteriaceae</i>      | <i>Bifidobacterium</i>      | not identified        | 1.82E-02        |
| 13                                                                                             | <i>Lachnospiraceae</i>         | <i>Ruminococcus</i>         | not identified        | 1.85E-02        |
| 14                                                                                             | <i>Lachnospiraceae</i>         | <i>Ruminococcus</i>         | <i>gnavus</i>         | 1.85E-02        |
| <sup>a</sup> Bacterial taxa that was significantly enriched in TLR7.1 Tg mice fecal pellets.   |                                |                             |                       |                 |
| <sup>b</sup> Bacterial taxa that was significantly suppressed in TLR7.1 Tg mice fecal pellets. |                                |                             |                       |                 |
| <sup>c</sup> Bacterial taxa modulated after False Discovery Rate analysis (q<0.05)             |                                |                             |                       |                 |

**Table S2. Related to Figure 2. List of modulated bacterial taxa in IMQ-treated mice.**

| <b>Table S2. List of modulated taxa in IMQ-treated mice</b>                                   |                                |                             |                       |                 |  |
|-----------------------------------------------------------------------------------------------|--------------------------------|-----------------------------|-----------------------|-----------------|--|
| <b>WT vs. WT + IMQ</b>                                                                        |                                |                             |                       |                 |  |
| Enriched <sup>a</sup>                                                                         |                                |                             |                       |                 |  |
| Rank <sup>c</sup>                                                                             | Family                         | Genus                       | Species               | P value         |  |
| 1                                                                                             | <i>Desulfovibrionaceae</i>     | <i>Desulfovibrio</i>        | not identified        | 1.07E-04        |  |
| 2                                                                                             | <i>Desulfovibrionaceae</i>     | not identified              | not identified        | 1.25E-04        |  |
| 3                                                                                             | <i>Prevotellaceae</i>          | not identified              | not identified        | 1.39E-04        |  |
| 4                                                                                             | <i>Prevotellaceae</i>          | <i>Prevotella</i>           | not identified        | 1.39E-04        |  |
| 5                                                                                             | <i>Rikenellaceae</i>           | not identified              | not identified        | 1.94E-04        |  |
| 6                                                                                             | <b><i>Lactobacillaceae</i></b> | <b><i>Lactobacillus</i></b> | <b><i>reuteri</i></b> | <b>2.92E-04</b> |  |
| 7                                                                                             | <i>Coriobacteriaceae</i>       | not identified              | not identified        | 7.10E-04        |  |
| 8                                                                                             | <i>Bifidobacteriaceae</i>      | <i>Bifidobacterium</i>      | not identified        | 1.36E-03        |  |
| 9                                                                                             | <i>Bifidobacteriaceae</i>      | not identified              | not identified        | 1.36E-03        |  |
| Suppressed <sup>b</sup>                                                                       |                                |                             |                       |                 |  |
| Rank <sup>c</sup>                                                                             | Family                         | Genus                       | Species               | P value         |  |
| 1                                                                                             | <i>Lachnospiraceae</i>         | <i>Anaerostipes</i>         | not identified        | 1.60E-05        |  |
| 2                                                                                             | <i>Turicibacteraceae</i>       | not identified              | not identified        | 2.98E-05        |  |
| 3                                                                                             | <i>Turicibacteraceae</i>       | <i>Turicibacter</i>         | not identified        | 2.98E-05        |  |
| 4                                                                                             | <b><i>Clostridiaceae</i></b>   | <b>not identified</b>       | <b>not identified</b> | <b>2.75E-04</b> |  |
| 5                                                                                             | <i>Erysipelotrichaceae</i>     | <i>Coprobacillus</i>        | not identified        | 1.19E-02        |  |
| <sup>a</sup> Bacterial taxa that was significantly enriched in WT + IMQ mice fecal pellets.   |                                |                             |                       |                 |  |
| <sup>b</sup> Bacterial taxa that was significantly suppressed in WT + IMQ mice fecal pellets. |                                |                             |                       |                 |  |
| <sup>c</sup> Bacterial taxa modulated after False Discovery Rate analysis ( $q < 0.05$ )      |                                |                             |                       |                 |  |

**Table S3. Related to Figure 3. List of modulated bacterial taxa in cohoused mice.**

| <b>Table S3. List of modulated taxa in cohoused mice</b>                                                               |                                |                             |                       |                 |
|------------------------------------------------------------------------------------------------------------------------|--------------------------------|-----------------------------|-----------------------|-----------------|
| <b>WT vs. WTL</b>                                                                                                      |                                |                             |                       |                 |
| Enriched <sup>a</sup>                                                                                                  |                                |                             |                       |                 |
| Rank <sup>c</sup>                                                                                                      | Family                         | Genus                       | Species               | P value         |
| 1                                                                                                                      | <i>Rikenellaceae</i>           | <i>AF12</i>                 | not identified        | 4.74E-05        |
| 2                                                                                                                      | <i>Desulfovibrionaceae</i>     | <i>Desulfovibrio</i>        | not identified        | 4.96E-05        |
| 3                                                                                                                      | <i>Helicobacteraceae</i>       | not identified              | not identified        | 5.03E-05        |
| 4                                                                                                                      | <i>Paraprevotellaceae</i>      | <i>Paraprevotella</i>       | not identified        | 5.03E-05        |
| <b>5</b>                                                                                                               | <b><i>Lactobacillaceae</i></b> | <b><i>Lactobacillus</i></b> | <b><i>reuteri</i></b> | <b>5.03E-05</b> |
| 6                                                                                                                      | <i>Odoribacteraceae</i>        | <i>Odoribacter</i>          | not identified        | 5.03E-05        |
| 7                                                                                                                      | <i>Odoribacteraceae</i>        | not identified              | not identified        | 5.03E-05        |
| 8                                                                                                                      | <i>Desulfovibrionaceae</i>     | not identified              | not identified        | 1.36E-04        |
| 9                                                                                                                      | <i>Helicobacteraceae</i>       | <i>Helicobacter</i>         | not identified        | 1.68E-04        |
| 10                                                                                                                     | <i>Rikenellaceae</i>           | not identified              | not identified        | 2.66E-04        |
| 11                                                                                                                     | <i>Coriobacteriaceae</i>       | not identified              | not identified        | 2.69E-04        |
| 12                                                                                                                     | <i>Porphyromonadaceae</i>      | <i>Parabacteroides</i>      | not identified        | 5.33E-04        |
| 13                                                                                                                     | <i>Porphyromonadaceae</i>      | not identified              | not identified        | 5.33E-04        |
| 14                                                                                                                     | <i>Paraprevotellaceae</i>      | not identified              | not identified        | 7.91E-04        |
| 15                                                                                                                     | <i>Paraprevotellaceae</i>      | <i>Prevotella</i>           | not identified        | 7.91E-04        |
| 16                                                                                                                     | <i>Bacteroidaceae</i>          | <i>Bacteroides</i>          | <i>acidifaciens</i>   | 8.84E-04        |
| 17                                                                                                                     | <i>Deferribacteraceae</i>      | <i>Mucispirillum</i>        | not identified        | 1.22E-02        |
| 18                                                                                                                     | <i>Deferribacteraceae</i>      | not identified              | not identified        | 1.22E-02        |
| 19                                                                                                                     | <i>Deferribacteraceae</i>      | <i>Mucispirillum</i>        | <i>schaedleri</i>     | 1.22E-02        |
| 20                                                                                                                     | <i>Mycoplasmataceae</i>        | not identified              | not identified        | 1.90E-02        |
| 21                                                                                                                     | <i>Rikenellaceae</i>           | <i>Rikenella</i>            | not identified        | 1.90E-02        |
| 22                                                                                                                     | <i>Erysipelotrichaceae</i>     | not identified              | not identified        | 2.05E-02        |
| 23                                                                                                                     | <i>Erysipelotrichaceae</i>     | <i>Allobaculum</i>          | not identified        | 2.05E-02        |
| 24                                                                                                                     | <i>Alcaligenaceae</i>          | not identified              | not identified        | 2.49E-02        |
| 25                                                                                                                     | <i>Alcaligenaceae</i>          | <i>Sutterella</i>           | not identified        | 2.49E-02        |
| Suppressed <sup>b</sup>                                                                                                |                                |                             |                       |                 |
| Rank <sup>c</sup>                                                                                                      | Family                         | Genus                       | Species               | P value         |
| 1                                                                                                                      | <i>Lachnospiraceae</i>         | not identified              | not identified        | 1.89E-03        |
| 2                                                                                                                      | <i>Lachnospiraceae</i>         | <i>Anaerostipes</i>         | not identified        | 2.58E-03        |
| 3                                                                                                                      | <i>Verrucomicrobiaceae</i>     | not identified              | not identified        | 2.59E-03        |
| 4                                                                                                                      | <i>Verrucomicrobiaceae</i>     | <i>Akkermansia</i>          | <i>muciniphila</i>    | 2.59E-03        |
| 5                                                                                                                      | <i>Verrucomicrobiaceae</i>     | <i>Akkermansia</i>          | not identified        | 2.59E-03        |
| 6                                                                                                                      | <i>Ruminococcaceae</i>         | <i>Ruminococcus</i>         | not identified        | 4.94E-03        |
| 7                                                                                                                      | <i>Turicibacteraceae</i>       | not identified              | not identified        | 8.30E-03        |
| 8                                                                                                                      | <i>Turicibacteraceae</i>       | <i>Turicibacter</i>         | not identified        | 8.30E-03        |
| 9                                                                                                                      | <i>Anaeroplasmataceae</i>      | <i>Anaeroplasma</i>         | not identified        | 1.11E-02        |
| 10                                                                                                                     | <i>Anaeroplasmataceae</i>      | not identified              | not identified        | 1.11E-02        |
| <b>11</b>                                                                                                              | <b><i>Clostridiaceae</i></b>   | <b>not identified</b>       | <b>not identified</b> | <b>2.62E-02</b> |
| 12                                                                                                                     | <i>Lachnospiraceae</i>         | <i>Ruminococcus</i>         | not identified        | 2.65E-02        |
| 13                                                                                                                     | <i>Lachnospiraceae</i>         | <i>Ruminococcus</i>         | <i>gnavus</i>         | 2.65E-02        |
| 14                                                                                                                     | <i>Ruminococcaceae</i>         | not identified              | not identified        | 2.66E-02        |
| <sup>a</sup> Bacterial taxa that was significantly enriched in WTL (WT littermate cohoused mice) fecal pellets.        |                                |                             |                       |                 |
| <sup>b</sup> Bacterial taxa that was significantly suppressed in WTL mice (WT littermate cohoused mice) fecal pellets. |                                |                             |                       |                 |
| <sup>c</sup> Bacterial taxa modulated after False Discovery Rate analysis (q<0.05)                                     |                                |                             |                       |                 |

**Table S4. Related to Figure 5. Composition of diets.**

| <b>Table S4. Composition of diets</b> |                      |                |                         |                   |
|---------------------------------------|----------------------|----------------|-------------------------|-------------------|
| <b>% By weight</b>                    | <b>Standard Diet</b> | <b>RS Diet</b> | <b>GF Standard Diet</b> | <b>GF RS Diet</b> |
| <b>Protein</b>                        | 18.6                 | 13.7           | 18.6                    | 13.7              |
| <b>Carbohydrate</b>                   | 44.2                 | 53.9           | 44.2                    | 53.7              |
| <b>Fat</b>                            | 6.2                  | 4.1            | 6.2                     | 4.1               |
| <b>Kcal/g</b>                         | 3.1                  | 3.1            | 3.1                     | 3.1               |

Standard diet: Teklad Global 18% Protein Rodent Diet (2018).  
RS diet: Unpurified Teklad Custom Diet TD.150492 - 40% HM-260 (RS) (2018).  
GF standard diet: Teklad Global 18% Protein Rodent Diet (Sterilizable, 2018S).  
GF RS diet: Unpurified Teklad Custom Diet TD.160604 - 40% HM-260 (RS) (2018S).

**Table S5. Related to Figure 5. List of modulated bacterial taxa in RS-fed mice.**

| <b>Table S5. List of modulated bacterial taxa in RS-fed mice</b>                                    |                                |                             |                       |                 |
|-----------------------------------------------------------------------------------------------------|--------------------------------|-----------------------------|-----------------------|-----------------|
| <b>TLR7.1 Tg vs. TLR7.1 Tg + RS</b>                                                                 |                                |                             |                       |                 |
| Enriched <sup>a</sup>                                                                               |                                |                             |                       |                 |
| Rank <sup>c</sup>                                                                                   | Family                         | Genus                       | Species               | P value         |
| 1                                                                                                   | <i>Bacteroidaceae</i>          | <i>Bacteroides</i>          | <i>acidifaciens</i>   | 5.00E-05        |
| 2                                                                                                   | <i>Anaeroplasmataceae</i>      | <i>Anaeroplasma</i>         | not identified        | 3.03E-03        |
| Suppressed <sup>b</sup>                                                                             |                                |                             |                       |                 |
| Rank <sup>c</sup>                                                                                   | Family                         | Genus                       | Species               | P value         |
| 1                                                                                                   | <i>Erysipelotrichaceae</i>     | not identified              | not identified        | 1.91E-04        |
| <b>2</b>                                                                                            | <b><i>Lactobacillaceae</i></b> | <b><i>Lactobacillus</i></b> | <b><i>reuteri</i></b> | <b>1.23E-03</b> |
| 3                                                                                                   | <i>Lactobacillaceae</i>        | <i>Lactobacillus</i>        | not identified        | 2.60E-03        |
| <sup>a</sup> Bacterial taxa that was significantly enriched in TLR7.1 Tg + RS mice fecal pellets.   |                                |                             |                       |                 |
| <sup>b</sup> Bacterial taxa that was significantly suppressed in TLR7.1 Tg + RS mice fecal pellets. |                                |                             |                       |                 |
| <sup>c</sup> Bacterial taxa modulated after False Discovery Rate analysis (q<0.05).                 |                                |                             |                       |                 |

**Table S6. Related to Figure 6. Frequencies of key immune populations in RS-fed mice.**

| <b>Table S6. Frequencies of key immune populations in RS-fed mice</b> |              |                  |                       |                             |                     |
|-----------------------------------------------------------------------|--------------|------------------|-----------------------|-----------------------------|---------------------|
| <b>Tregs</b>                                                          | <b>WT</b>    | <b>TLR7.1 Tg</b> | <b>TLR7.1 Tg + RS</b> | <b>P value <sup>a</sup></b> | <b>Significance</b> |
| <b>Blood</b>                                                          | 7.500±0.995  | 18.474±3.204     | 21.362±4.971          | 0.5659                      | ns                  |
| <b>Spleen</b>                                                         | 8.699±0.589  | 14.712±1.962     | 12.798±1.909          | 0.4388                      | ns                  |
| <b>MLN</b>                                                            | 6.370±0.528  | 14.361±1.814     | 8.342±1.779           | 0.0216                      | *                   |
| <b>PP</b>                                                             | 6.352±0.645  | 18.116±1.834     | 17.883±2.496          | 0.9339                      | ns                  |
| <b>SI-LP</b>                                                          | 9.853±1.324  | 17.866±2.138     | 13.801±1.706          | 0.1640                      | ns                  |
| <b>SI-IEL</b>                                                         | 7.102±1.268  | 10.472±1.835     | 9.877±1.443           | 0.8036                      | ns                  |
| <b>Th17</b>                                                           | <b>WT</b>    | <b>TLR7.1 Tg</b> | <b>TLR7.1 Tg + RS</b> | <b>P value <sup>a</sup></b> | <b>Significance</b> |
| <b>Spleen</b>                                                         | 1.377±0.198  | 3.197±0.330      | 2.240±0.267           | 0.0088                      | **                  |
| <b>MLN</b>                                                            | 0.542±0.053  | 1.422±0.179      | 0.930±0.246           | 0.1460                      | ns                  |
| <b>Neutrophils</b>                                                    | <b>WT</b>    | <b>TLR7.1 Tg</b> | <b>TLR7.1 Tg + RS</b> | <b>P value <sup>a</sup></b> | <b>Significance</b> |
| <b>Blood</b>                                                          | 0.371±0.134  | 1.290±0.230      | 1.711±0.427           | 0.3059                      | ns                  |
| <b>Spleen</b>                                                         | 0.443±0.067  | 3.659±0.604      | 2.357±0.448           | 0.0436                      | *                   |
| <b>MLN</b>                                                            | 0.033±0.018  | 0.386±0.110      | 0.261±0.050           | 0.2354                      | ns                  |
| <b>PP</b>                                                             | 0.035±0.021  | 0.205±0.038      | 0.045±0.014           | 0.0001                      | ****                |
| <b>SI-LP</b>                                                          | 0.244±0.086  | 1.477±0.546      | 1.489±0.619           | 0.9849                      | ns                  |
| <b>SI-IEL</b>                                                         | 0.165±0.049  | 0.859±0.535      | 1.040±0.639           | 0.7708                      | ns                  |
| <b>CD44<sup>+</sup>CD4<sup>+</sup></b>                                | <b>WT</b>    | <b>TLR7.1 Tg</b> | <b>TLR7.1 Tg + RS</b> | <b>P value <sup>a</sup></b> | <b>Significance</b> |
| <b>T cells</b>                                                        |              |                  |                       |                             |                     |
| <b>Spleen</b>                                                         | 18.267±2.488 | 85.025±1.221     | 59.125±3.895          | 0.0001                      | ****                |
| <b>MLN</b>                                                            | 9.387±0.598  | 39.175±4.695     | 23.750±1.690          | 0.0017                      | **                  |
| <b>CD44<sup>+</sup>CD8<sup>+</sup></b>                                | <b>WT</b>    | <b>TLR7.1 Tg</b> | <b>TLR7.1 Tg + RS</b> | <b>P value <sup>a</sup></b> | <b>Significance</b> |
| <b>T cells</b>                                                        |              |                  |                       |                             |                     |
| <b>Spleen</b>                                                         | 18.067±1.097 | 89.875±0.985     | 59.100±5.387          | 0.0001                      | ****                |
| <b>MLN</b>                                                            | 6.970±0.119  | 40.150±2.911     | 26.050±1.051          | 0.0022                      | **                  |

<sup>a</sup> P values listed represent TLR7.1 Tg vs. TLR7.1 Tg + RS comparisons.  
The results are expressed as the mean percentage ± SEM (n = 3-21 mice per group).  
\*P<0.05 was considered statistically significant; \*\*P<0.01; \*\*\*P<0.001; \*\*\*\*P<0.0001; ns = not significant;  
MLN = mesenteric lymph nodes; PP = Peyer's patches; SI-LP = small intestine lamina propria; SI-IEL = small intestine intraepithelial leukocytes



**Table S7. Related to Figure 7. SCFAs levels in RS-fed mice.**

| <b>Table S7. SCFAs levels in RS-fed mice</b>                                                                                                                                                                                                                                                                                                                                                                                                                                |                               |            |             |               |                      |             |                |                      |                      |
|-----------------------------------------------------------------------------------------------------------------------------------------------------------------------------------------------------------------------------------------------------------------------------------------------------------------------------------------------------------------------------------------------------------------------------------------------------------------------------|-------------------------------|------------|-------------|---------------|----------------------|-------------|----------------|----------------------|----------------------|
| <b>GF mice</b>                                                                                                                                                                                                                                                                                                                                                                                                                                                              | Sample                        | SCFAs      | WT          | WT + RS       | P value <sup>a</sup> |             |                |                      |                      |
|                                                                                                                                                                                                                                                                                                                                                                                                                                                                             | <b>Fecal Pellets (μmol/g)</b> | Acetate    | na          | na            | na                   |             |                |                      |                      |
|                                                                                                                                                                                                                                                                                                                                                                                                                                                                             |                               | Propionate | na          | na            | na                   |             |                |                      |                      |
|                                                                                                                                                                                                                                                                                                                                                                                                                                                                             |                               | Butyrate   | na          | na            | na                   |             |                |                      |                      |
|                                                                                                                                                                                                                                                                                                                                                                                                                                                                             | <b>Colon (μmol/g)</b>         | Acetate    | 1.905±0.99  | 1.511±0.22    | 0.9421               |             |                |                      |                      |
|                                                                                                                                                                                                                                                                                                                                                                                                                                                                             |                               | Propionate | 0.139±0.12  | 0.036±0.01    | 0.8990               |             |                |                      |                      |
|                                                                                                                                                                                                                                                                                                                                                                                                                                                                             |                               | Butyrate   | 0.166±0.15  | 0.047±0.02    | 0.9212               |             |                |                      |                      |
|                                                                                                                                                                                                                                                                                                                                                                                                                                                                             | <b>Cecum (μmol/g)</b>         | Acetate    | 0.825±0.15  | 0.382±0.04    | 0.9350               |             |                |                      |                      |
|                                                                                                                                                                                                                                                                                                                                                                                                                                                                             |                               | Propionate | 0.021±0.01  | 0.010±0.01    | 0.9901               |             |                |                      |                      |
| Butyrate                                                                                                                                                                                                                                                                                                                                                                                                                                                                    |                               | 0.017±0.01 | 0.007±0.01  | 0.9927        |                      |             |                |                      |                      |
| <b>SPF mice</b>                                                                                                                                                                                                                                                                                                                                                                                                                                                             | Sample                        | SCFAs      | WT          | WT + RS       | P value <sup>b</sup> | TLR7.1 Tg   | TLR7.1 Tg + RS | P value <sup>c</sup> | P value <sup>d</sup> |
|                                                                                                                                                                                                                                                                                                                                                                                                                                                                             | <b>Fecal Pellets (μmol/g)</b> | Acetate    | 10.625±0.47 | 14.950±1.27   | 0.1313               | 25.000±1.48 | 21.000±1.61    | 0.1746               | <b>0.0001</b>        |
|                                                                                                                                                                                                                                                                                                                                                                                                                                                                             |                               | Propionate | 4.088±0.11  | 3.783±0.29    | 0.7308               | 7.190±0.58  | 7.367±0.80     | 0.8344               | <b>0.0002</b>        |
|                                                                                                                                                                                                                                                                                                                                                                                                                                                                             |                               | Butyrate   | 2.534±0.24  | 4.007±0.64    | <b>0.0327</b>        | 3.509±0.56  | 3.405±0.44     | 0.8746               | 0.1123               |
|                                                                                                                                                                                                                                                                                                                                                                                                                                                                             | <b>Colon (μmol/g)</b>         | Acetate    | 25.780±6.78 | 23.018±4.07   | 0.5830               | 14.449±4.85 | 7.016±2.08     | 0.0897               | <b>0.0215</b>        |
|                                                                                                                                                                                                                                                                                                                                                                                                                                                                             |                               | Propionate | 3.779±0.52  | 5.551±0.41    | <b>0.0233</b>        | 4.102±1.06  | 2.066±0.61     | <b>0.0030</b>        | 0.6523               |
|                                                                                                                                                                                                                                                                                                                                                                                                                                                                             |                               | Butyrate   | 5.215±1.27  | 3.710±1.09    | 0.1812               | 1.515±0.63  | 1.349±0.52     | 0.8616               | <b>0.0011</b>        |
|                                                                                                                                                                                                                                                                                                                                                                                                                                                                             | <b>Cecum (μmol/g)</b>         | Acetate    | 28.725±4.14 | 29.200±3.30   | 0.9246               | 28.192±2.15 | 19.464±2.59    | <b>0.0478</b>        | 0.9109               |
|                                                                                                                                                                                                                                                                                                                                                                                                                                                                             |                               | Propionate | 4.478±0.35  | 6.286±0.32    | <b>0.0209</b>        | 5.162±0.26  | 4.629±0.24     | 0.4127               | 0.3434               |
| Butyrate                                                                                                                                                                                                                                                                                                                                                                                                                                                                    |                               | 5.472±0.63 | 9.202±0.86  | <b>0.0017</b> | 3.628±0.62           | 4.009±0.93  | 0.6895         | 0.0865               |                      |
| <sup>a</sup> P values listed represent GF WT vs. GF WT + RS comparisons.<br><sup>b</sup> P values listed represent SPF WT vs. SPF WT + RS comparisons.<br><sup>c</sup> P values listed represent TLR7.1 Tg vs. TLR7.1 Tg + RS comparisons.<br><sup>d</sup> P values listed represent SPF WT vs. TLR7.1 Tg comparisons.<br>The results are expressed as the mean ± SEM (n = 3-10 mice per group).<br>*P values in bold represent statistical significance; na = not analyzed |                               |            |             |               |                      |             |                |                      |                      |
